# Supplementary material for: High-performance asymmetric electrode structured light-stimulated synaptic transistor for artificial neural networks
Source: Royal Society of Chemistry journal article supplement (doi:10.1039/d3mh00775h), 2023-01-01
Supplement: d3mh00775h1.pdf [file d3mh00775h1.pdf]

## Supporting information

### High-performance Asymmetric Electrode Structured Light-stimulated Synaptic Transistor for Artificial Neural Networks

Yixin Ran<sup>#a</sup>, Wanlong Lu<sup>#a</sup>, Xin Wang<sup>#a</sup>, Zongze Qin<sup>a</sup>, Xinsu Qin<sup>b</sup>, Guanyu Lu<sup>a</sup>,  
Zhen Hu<sup>a</sup>, Yuanwei Zhu<sup>a</sup>, Laju Bu<sup>b</sup>, Guanghao Lu<sup>\*a</sup>.

<sup>a</sup>Frontier Institute of Science and Technology, State Key Laboratory of Electrical Insulation and Power Equipment, Xi'an Jiaotong University, Xi'an , Shaanxi Province, 710054, China.

<sup>b</sup>. School of Chemistry, Xi'an Jiaotong University, Xi'an, Shaanxi Province, 710049, China.

<sup>#</sup>These authors contribute equally.

(\*The author to whom correspondence may be addressed:  
guanghao.lu@mail.xjtu.edu.cn)

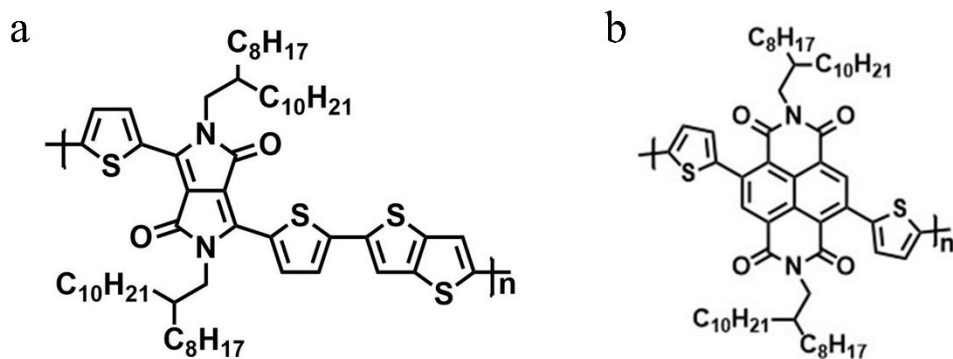

**Figure S1.** The respective molecular structures of DPP-DTT and N2200.

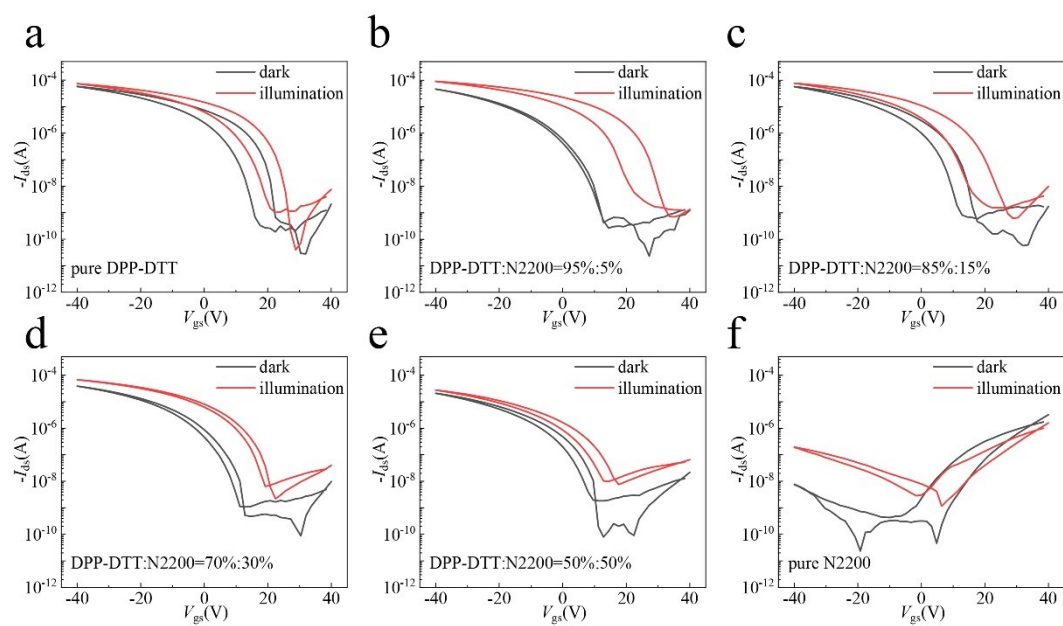

**Figure S2.** The transfer curves of different ratios of N2200 doped into DPP-DTT before and after experiencing light illumination.

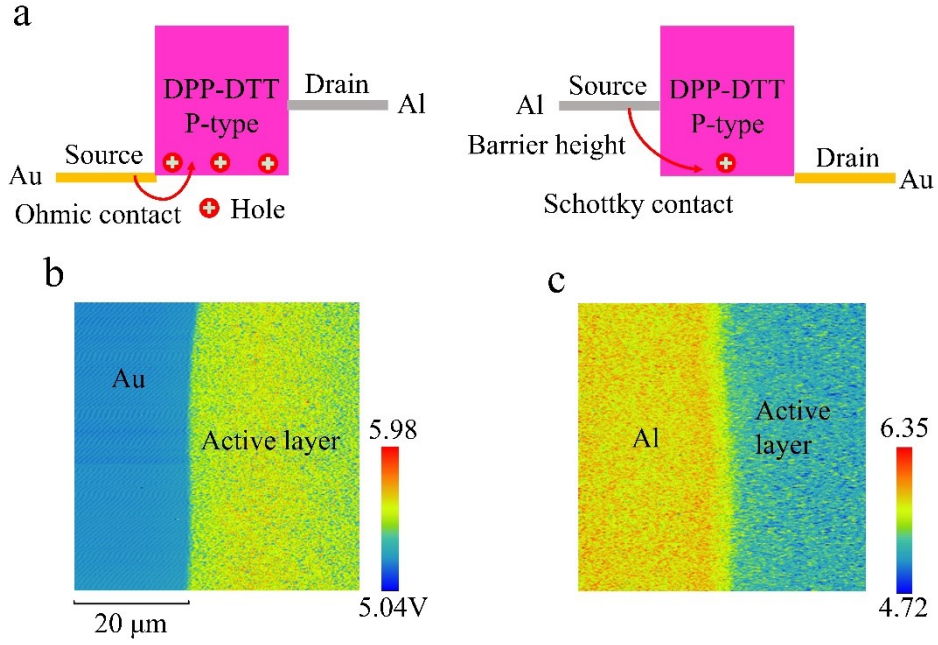

**Figure S3.** (a) Schematic diagram of the operating principle of the DPP-DDT: N2200 asymmetric electrode transistor device. Surface potential of asymmetric electrode devices. (b) Au acts as source electrode. (c) Al acts as source electrode.

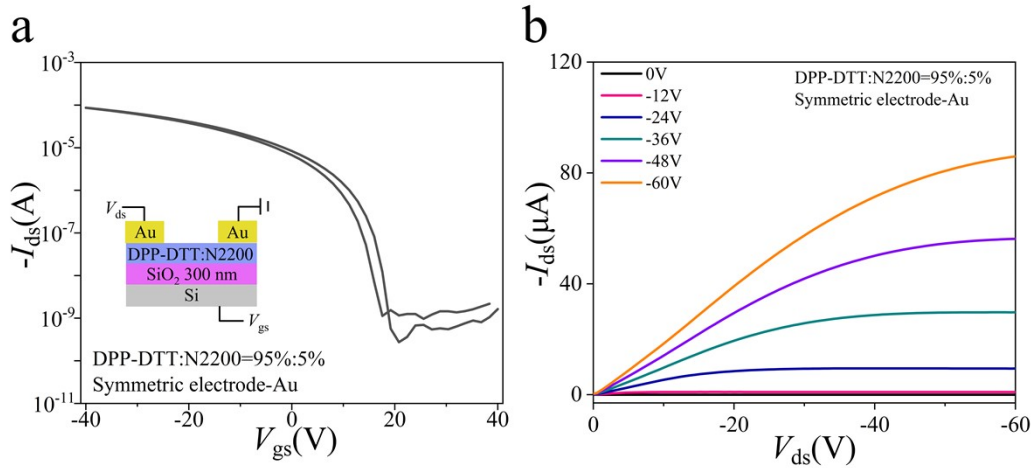

**Figure S4.** Transfer curve and output curve of conventional symmetrical electrode OFET. (a) Transfer curve. (b) Output curve.

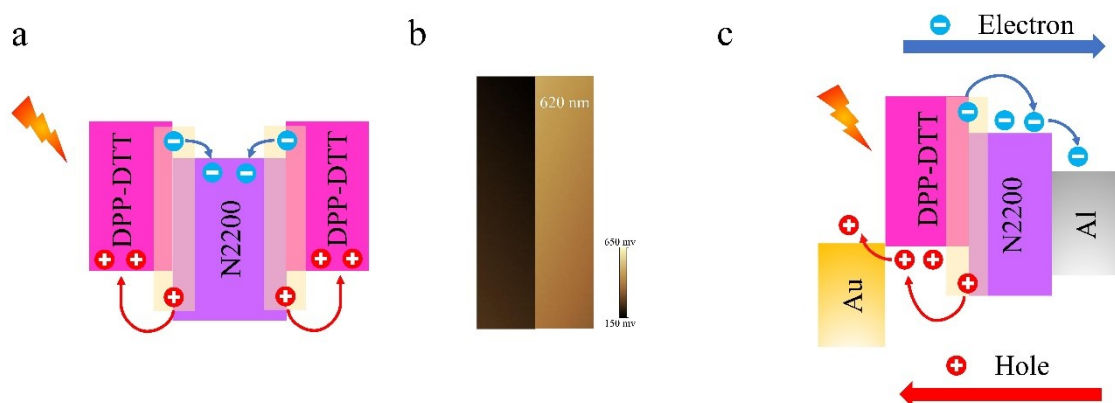

**Figure S5.** (a) Energy band during light illumination. (b) Surface potential of the blending film utilizing KPFM after light illumination. (c) Schematic diagram of asymmetric electrode device current becomes larger during light illumination.

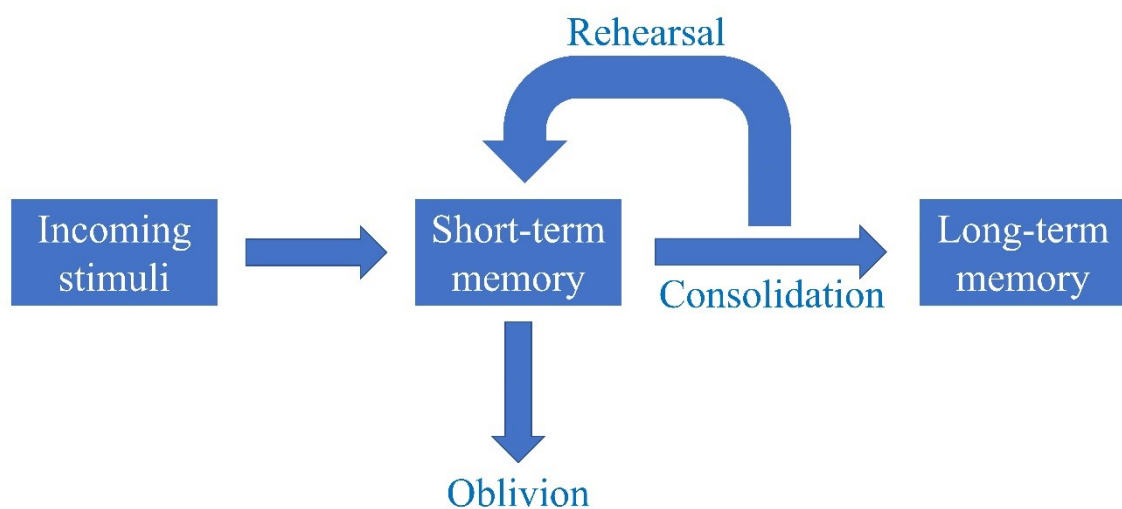

**Figure S6.** Schematic diagram of the human brain memory pattern.

| Input   |         | Output |     |
|---------|---------|--------|-----|
| Light 1 | Light 2 | OR     | AND |
| 0       | 0       | 0      | 0   |
| 1       | 0       | 1      | 0   |
| 0       | 1       | 1      | 0   |
| 1       | 1       | 1      | 1   |

**Figure S7.** Truth table for the two logic functions of As-LSST.

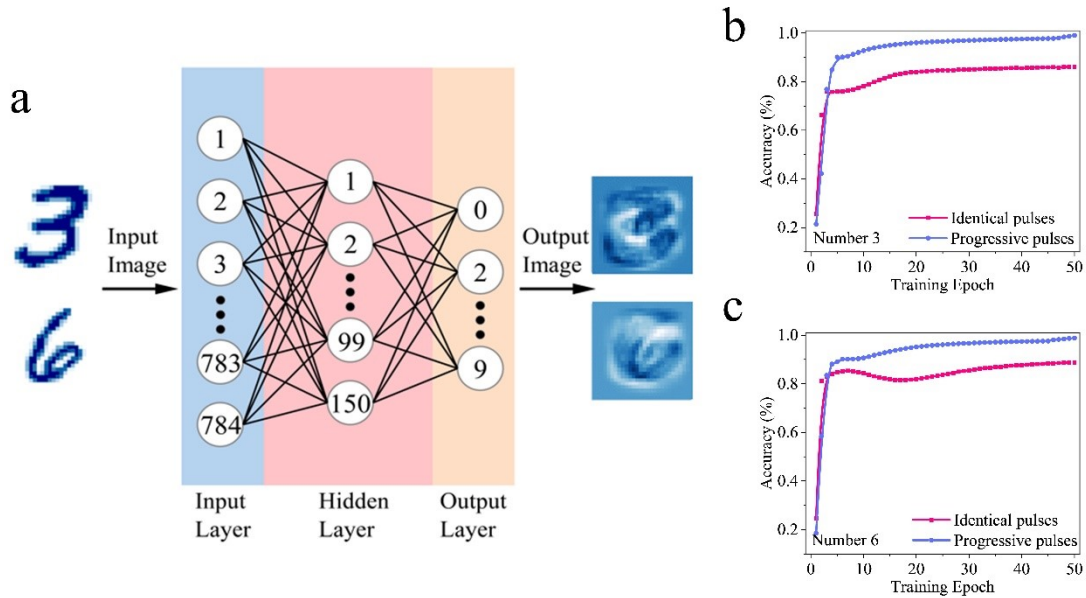

**Figure S8.** (a) Schematic diagram of the artificial neural network constructed by the As-LSST device used for the recognition task. Evolution of the recognition accuracy of the artificial neural network composed of As-LSSTs for handwritten digits: (b) number “3” and (c) number “6”.

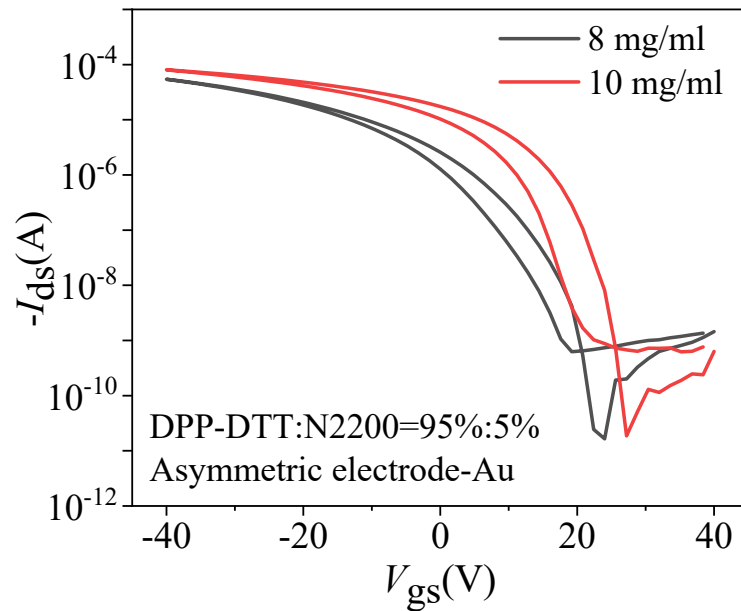

**Figure S9.** Transfer curves of asymmetric electrode devices for different semiconductor layer concentrations.

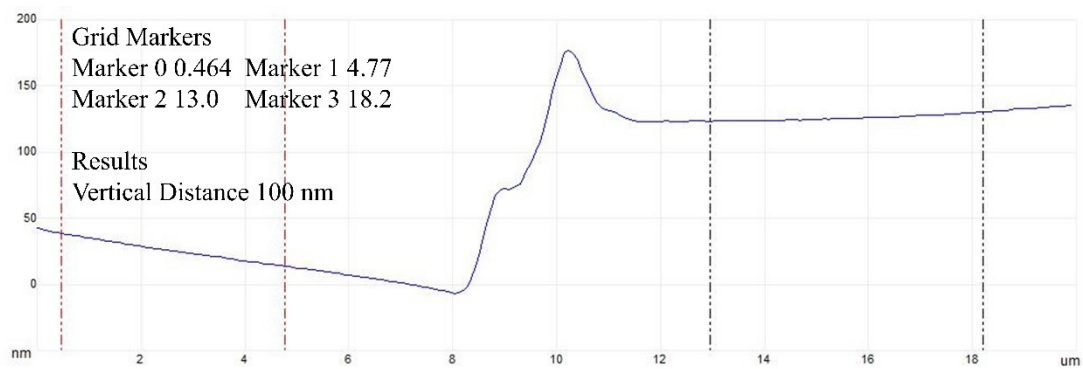

**Figure S10.** DPP-DTT: N2200 heterojunction film thickness.

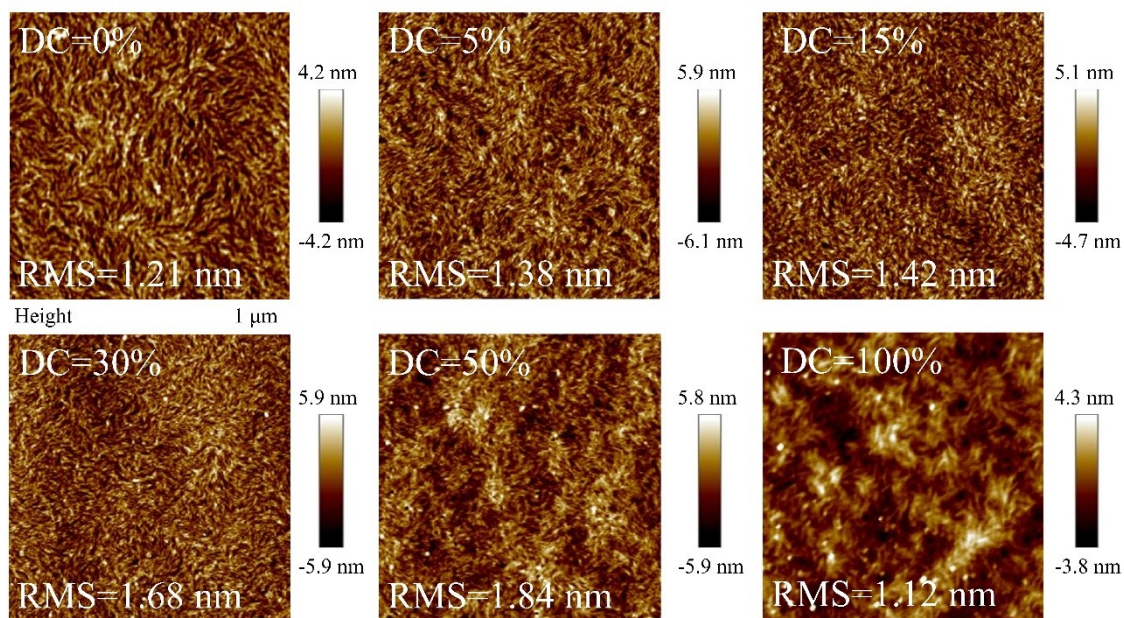

**Figure S11.** Topography images of thin films after doping with different ratios of N2200 into DPP-DTT.

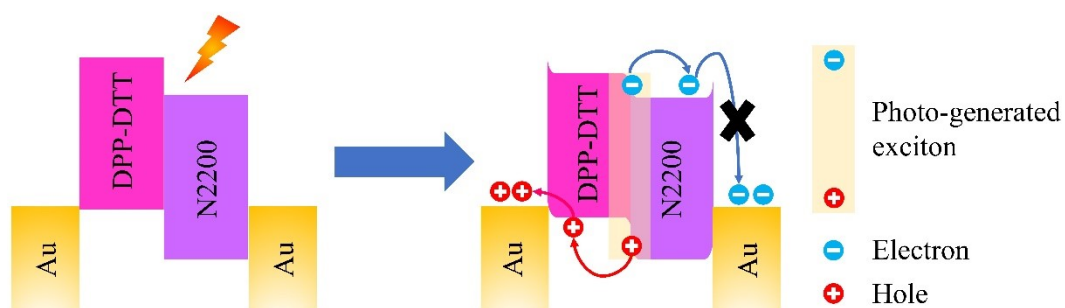

**Figure S12.** Schematic diagram of DPP-DTT: N2200 symmetric electrode device after illumination.



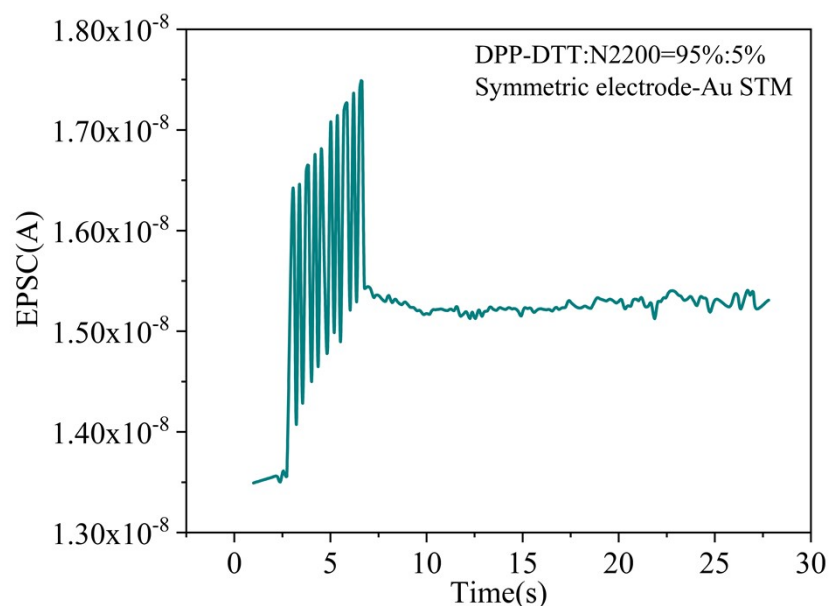

**Figure S13.** EPSC of DPP-DDT: N2200 symmetric electrode device after 10 light pulses of stimulation ( $V_g = 15$  V,  $V_{ds} = -5$  V).

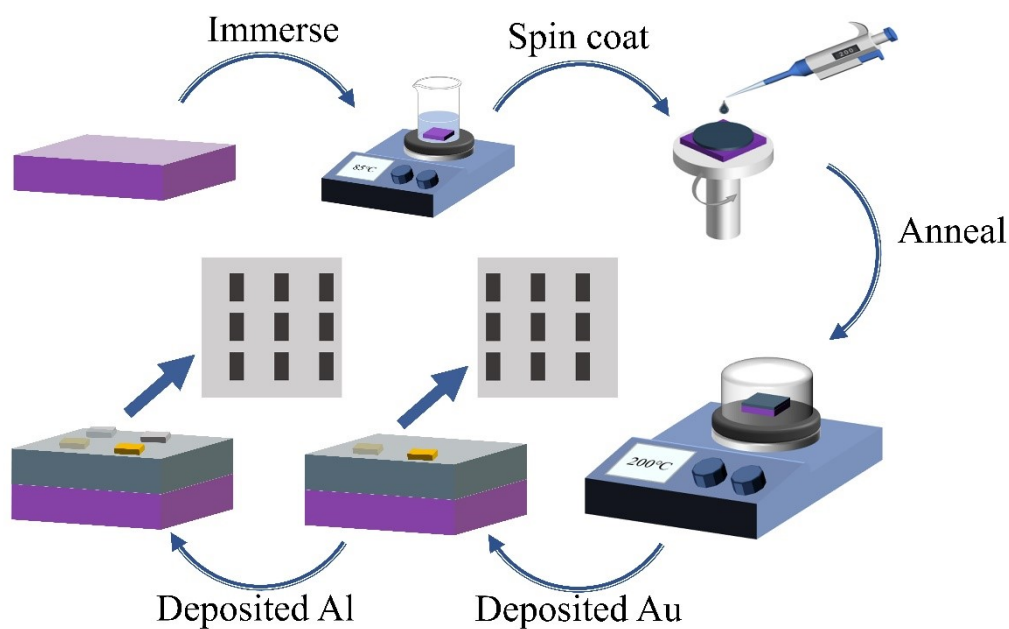

**Figure S14.** Schematic diagram of DPP-DDT: N2200 As-LSST device preparation.



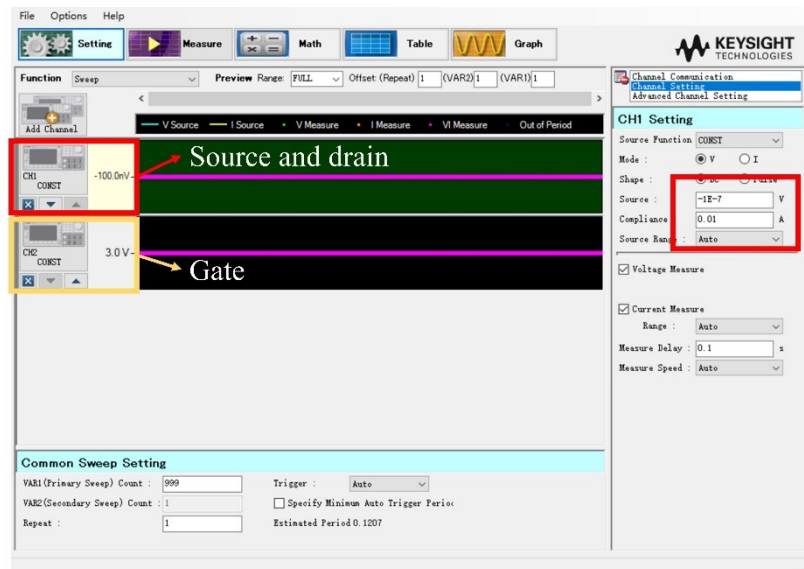

**Figure S15.** Parameter setting interface of an Agilent Keysight B2900A Quick IV measurement system.

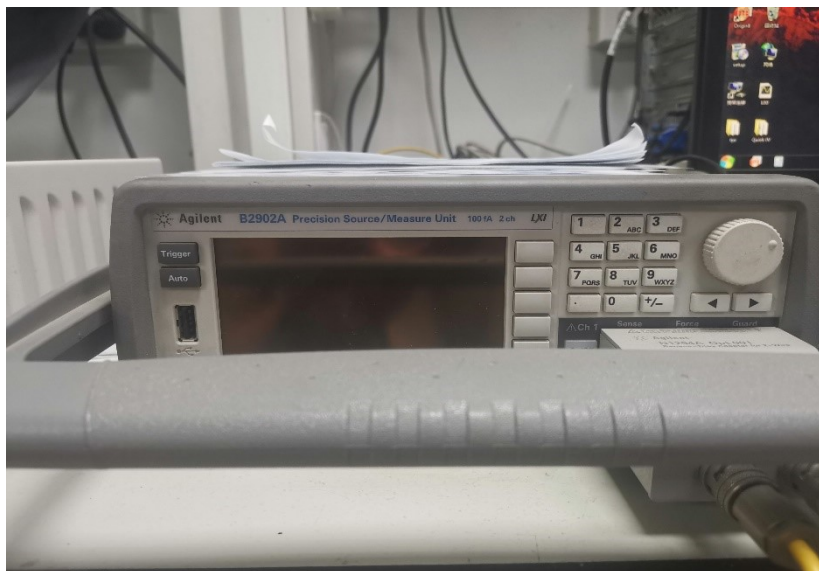

**Figure S16.** Physical photography of an Agilent Keysight B2900A Quick IV measurement system.

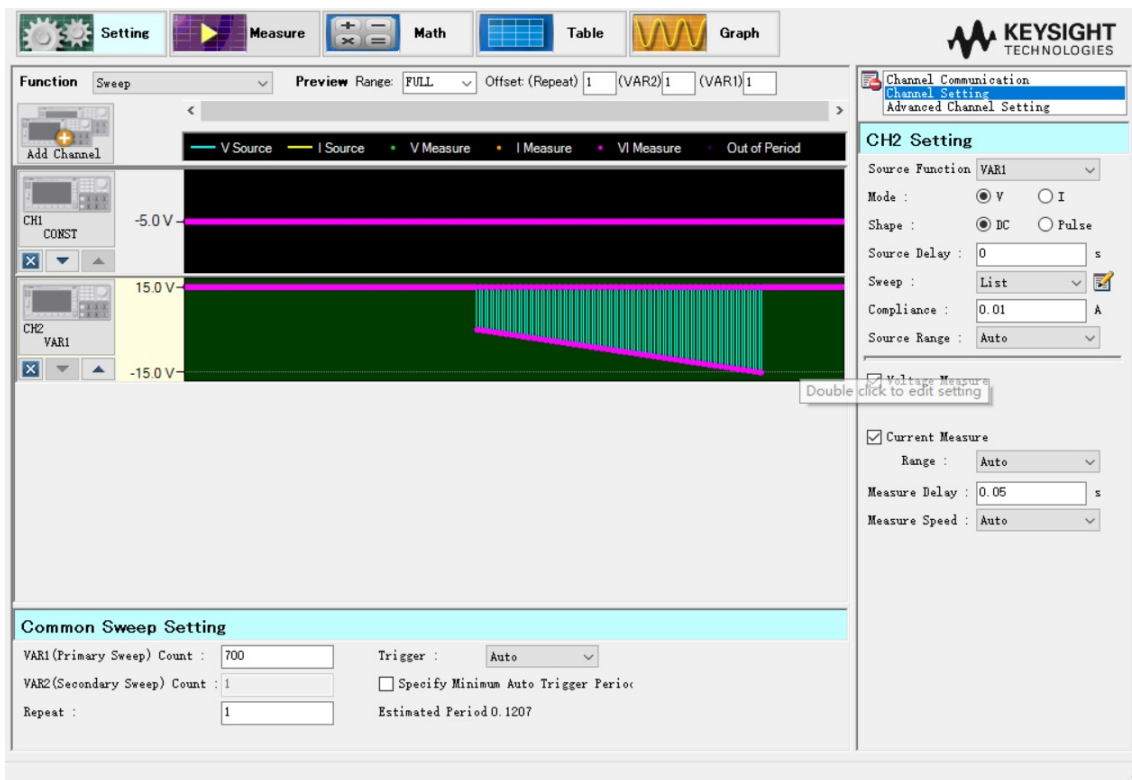

**Figure S17.** Digital recognition experiment condition setting interface by an Agilent Keysight B2900A Quick IV measurement system.
